# Supplementary material for: The structure of a ferrous heme-nitro species in the binuclear heme a3/CuB center of ba3-cytochrome c oxidase as determined by resonance Raman spectroscopy
Source: Royal Society of Chemistry journal article supplement (doi:10.1039/c4cc08019j), 2014-11-10
Supplement: c4cc08019j1.pdf [file c4cc08019j1.pdf]

## Electronic Supplementary Information

### Structure of a ferrous heme-nitro species in the binuclear heme $a_3$ / $\text{Cu}_B$ center of $ba_3$ -cytochrome $c$ oxidase as determined by resonance Raman spectroscopy

Andreas Loullis,<sup>a</sup> Mohamed Radzi Noor,<sup>b</sup> Tewfik Soulimane<sup>b</sup> and Eftychia Pinakoulaki<sup>a\*</sup>

<sup>a</sup>Department of Chemistry, University of Cyprus, P.O. Box 20537, 1678 Nicosia, Cyprus and

<sup>b</sup>Chemical & Environmental Sciences Department and Materials & Surface Science Institute, University of Limerick, Limerick, Ireland

#### Experimental Methods

The  $ba_3$ -oxidase was isolated from *T. thermophilus* HB8 cells according to the published procedures.<sup>16</sup> The purified enzyme was concentrated to 200-400  $\mu\text{M}$ , frozen in liquid nitrogen and stored at  $-80\text{ }^\circ\text{C}$  until use. Chemicals were purchased from Sigma Aldrich and were of analytical grade. The  $ba_3$ -oxidase samples used for optical absorption and RR measurements were diluted to 5  $\mu\text{M}$  and 50  $\mu\text{M}$ , respectively, using the desired buffers (pH 6.0, MES; pH 7.5, Tris-HCl; pH 9.0, CHES). The pD of solutions prepared in  $\text{D}_2\text{O}$  buffers were measured by using a pH meter and were reported by assuming  $\text{pD} = \text{pH} (\text{observed}) + 0.4$ . The nitrite adducts of  $ba_3$ -oxidase were prepared by incubation of the oxidized enzyme with a 500-fold excess of sodium nitrite for 5 h and the subsequent addition of a 300-fold excess of cysteine under anaerobic conditions that were attained by cycling the samples 4-6 times between vacuum and nitrogen in a vacuum line. The isotopically labeled  $\text{Na}^{15}\text{NO}_2$  (98%  $^{15}\text{N}$ , 95% CP) and  $\text{Na}^{15}\text{N}^{18}\text{O}_2$  (98%  $^{15}\text{N}$ , 90%  $^{18}\text{O}$ , 95% CP) were obtained from Sigma Aldrich.

Optical absorption spectra were collected with a Shimadzu UV1700 UV-Vis spectrometer. All samples were prepared under anaerobic conditions in quartz cells. Optical absorption spectra were collected upon the addition of 15 mM cysteine to nitrite solution (25 mM) to control if nitrite is reduced by cysteine under our experimental conditions. The absorbance of the nitrite band at 354 nm ( $\epsilon_{354}=22.7\text{ M}^{-1}\text{ cm}^{-1}$ ) remained constant confirming that nitrite is not reduced by cysteine in agreement with previous report.<sup>9</sup> Resonance Raman spectra were acquired at room temperature ( $20\text{ }^\circ\text{C}$ ) using a 640mm focal length Czerny-

Turner spectrograph (Horiba, T64000 system operated in single stage), equipped with a 1800 g/mm holographic grating and a Horiba Symphony BIUV1024x256 CCD detector. Samples were placed anaerobically in a quartz spinning tube to minimize local heating, and scattering was collected in a  $90^\circ$  geometry. The excitation wavelength at 441.6 nm was provided by a Kimmon HeCd laser, and a Semrock 442 nm long-pass edge filter was used to reject Rayleigh scattering. The power incident on the sample was 4-5 mW and the total accumulation time for each spectrum was 20-40 min. An Ondax SureLock LM-405 laser with an integrated CleanLine ASE filter was used to provide the excitation wavelength at 405 nm, and a Semrock StopLine 405 nm single-notch filter was used to reject Rayleigh scattering. The power incident on the sample was 4 mW and total accumulation time for each spectrum was 10-20 min. The Raman shifts were calibrated using toluene. Origin software (OriginLabs) was used for spectra processing and analysis. Optical absorption spectra before and after the Raman measurements were collected to ensure the formation and stability of the  $ba_3$ -NO<sub>2</sub><sup>-</sup> adducts.

### Supplementary Figures

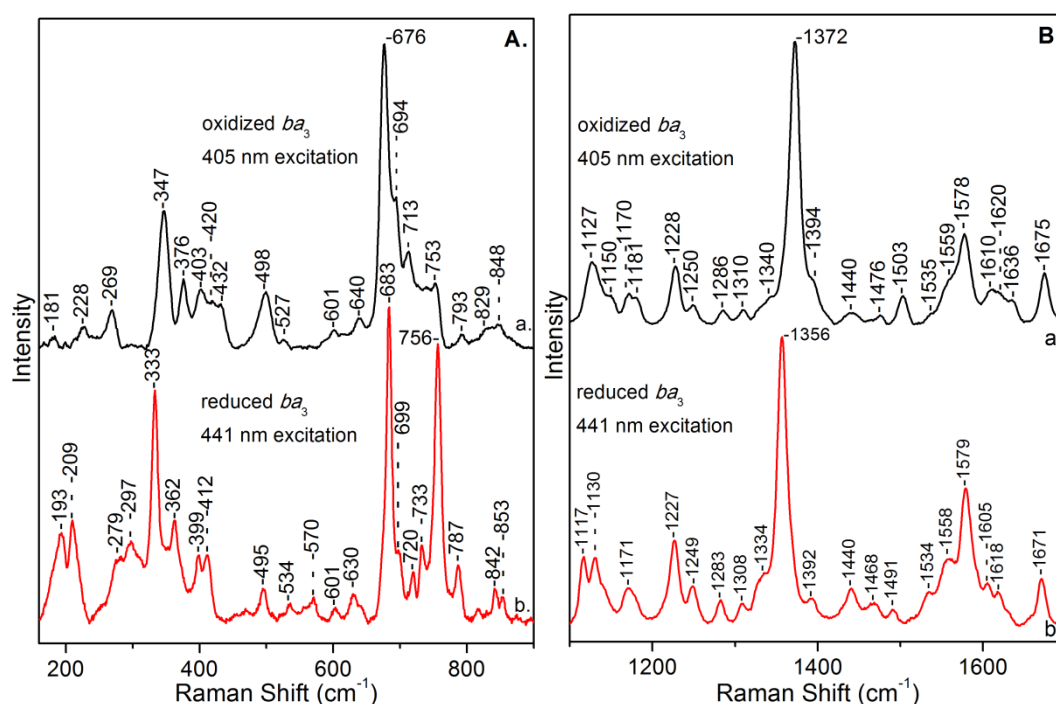

**Fig. S1** Resonance Raman spectra of  $ba_3$ -oxidase in the oxidized (trace a) and fully-reduced (trace b) forms in the low frequency (panel A) and high frequency (panel B) regions. The excitation wavelengths were 405 nm and 441 nm for the oxidized and reduced forms of  $ba_3$ -oxidase, respectively.

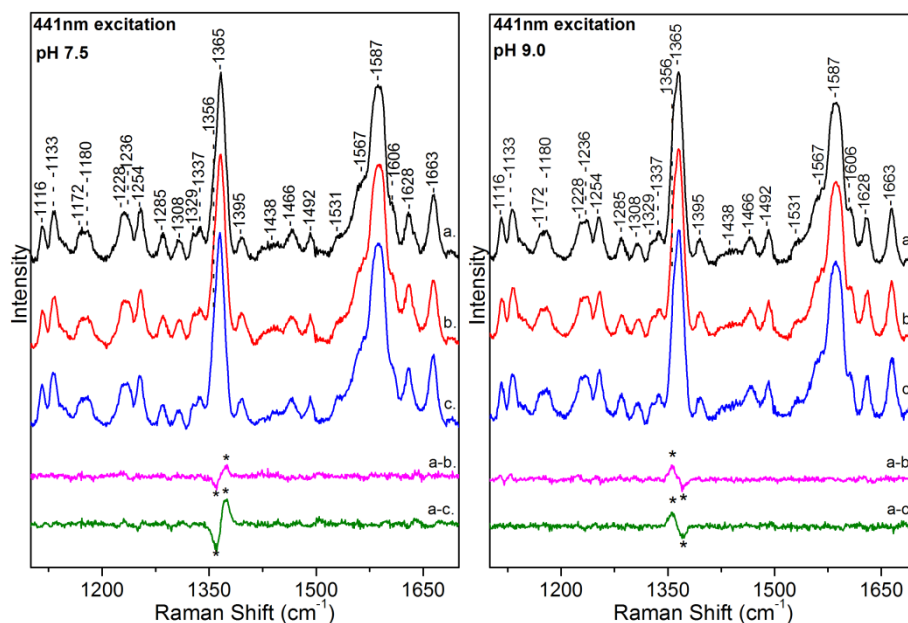

**Fig. S2** High frequency resonance Raman spectra of the cytochrome  $ba_3$ -NO<sub>2</sub> adducts formed after cysteine addition to  $^{14}\text{N}^{16}\text{O}_2^-$  (trace a),  $^{15}\text{N}^{16}\text{O}_2^-$  (trace b) and  $^{15}\text{N}^{18}\text{O}_2^-$  incubated enzyme at pH 7.5 (left panel) and pH 9.0 (right panel). The difference a-b ( $ba_3$ - $^{14}\text{N}^{16}\text{O}_2$  minus  $ba_3$ - $^{15}\text{N}^{16}\text{O}_2$ ) and a-c ( $ba_3$ - $^{14}\text{N}^{16}\text{O}_2$  minus  $ba_3$ - $^{15}\text{N}^{18}\text{O}_2$ ) resonance Raman spectra are included in each panel. The excitation wavelength was 441 nm and the incident power on the samples 4-5 mW.
